# Supplementary material for: Potentin vivoantimalarial activity of water-soluble artemisinin nano-preparations
Source: Royal Society of Chemistry journal article supplement (doi:10.1039/d0ra05597b), 2020-01-01
Supplement: d0ra05597b1.pdf [file d0ra05597b1.pdf]

## Supporting Information

### **Potent *in vivo* antimalarial activity of water-soluble Artemisinin nano-preparations**

Praveesh Valissery<sup>†a</sup>, Roshni Thapa<sup>†b</sup>, Jyoti Singh<sup>†c</sup>, Deepak Gaur<sup>b</sup>, Jaydeep Bhattacharya<sup>\*b</sup>, Agam Prasad Singh<sup>\*c</sup>, Suman Kumar Dhar<sup>\*a</sup>

<sup>a</sup> Special Center for Molecular Medicine, Jawaharlal Nehru University, New Delhi, 110067, India. <sup>b</sup> School of Biotechnology, Jawaharlal Nehru University, New Delhi, 110067, India. <sup>c</sup> National Institute of Immunology, New Delhi, 110067, India.

**A**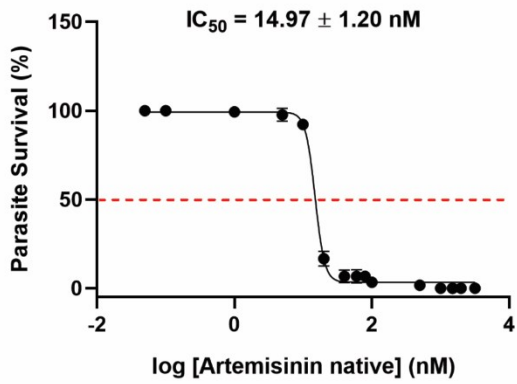**B**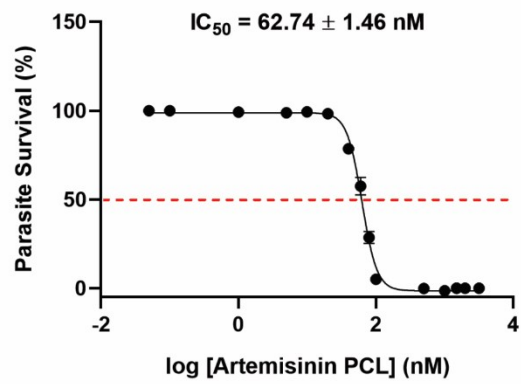**C**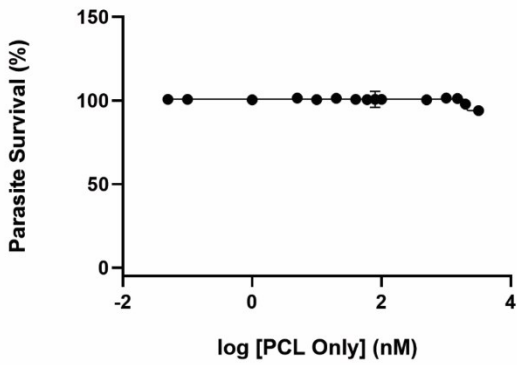**Supplementary Figure 1: Standardization of the in vitro antiplasmodial activity of the PCL**

**Artemisinin nanoformulations.** Dose response curves were generated by incubating synchronized ring stage parasites with increasing concentrations of the indicated formulation for a period of 48h and the parasitemia was estimated by SYBR green I assay.

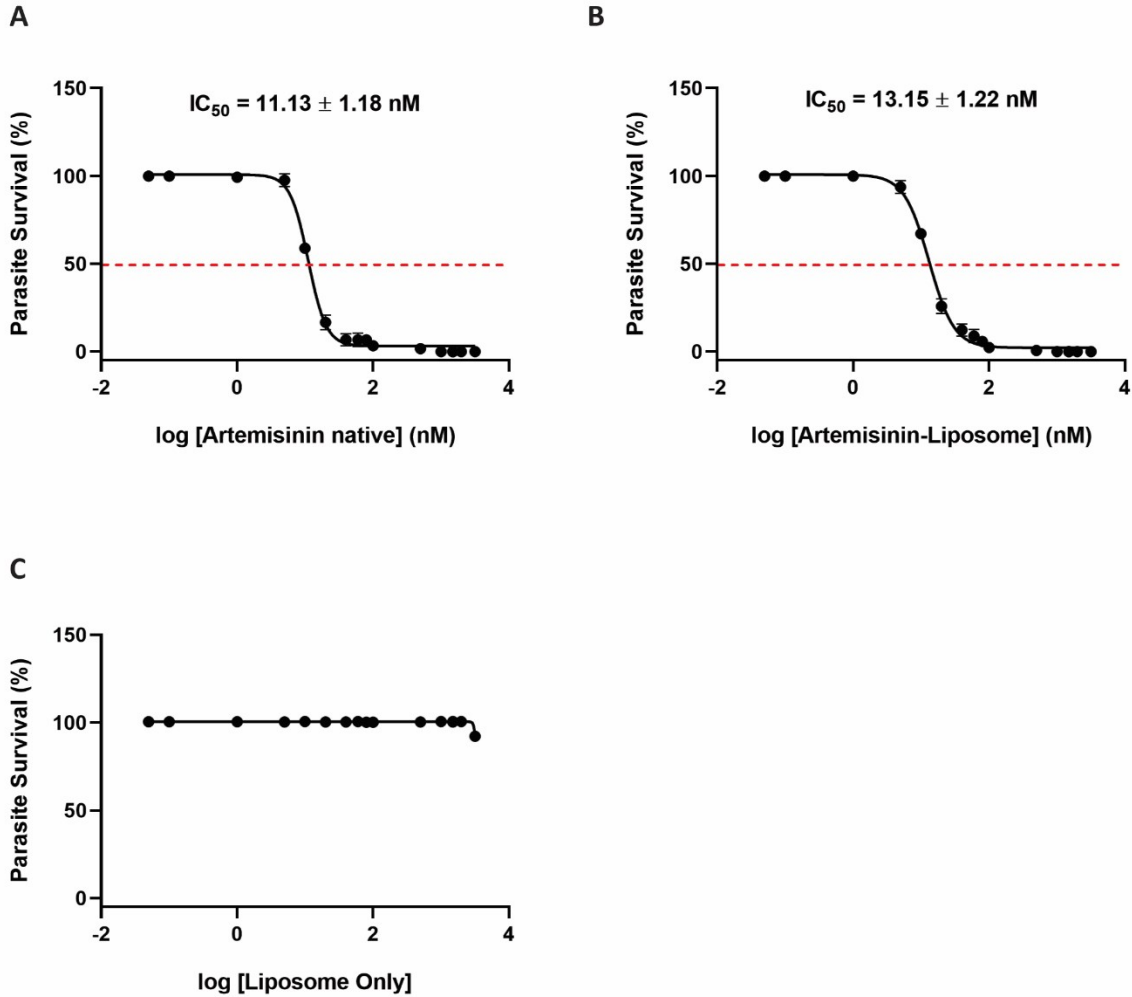

**Supplementary Figure 2: Standardization of the *in vitro* antiplasmodial activity of the Liposome based Artemisinin nanoformulations.** Dose response curves were generated by incubating synchronized ring stage parasites with increasing concentrations of the indicated formulation for a period of 48h and the parasitemia was estimated by SYBR green I assay.

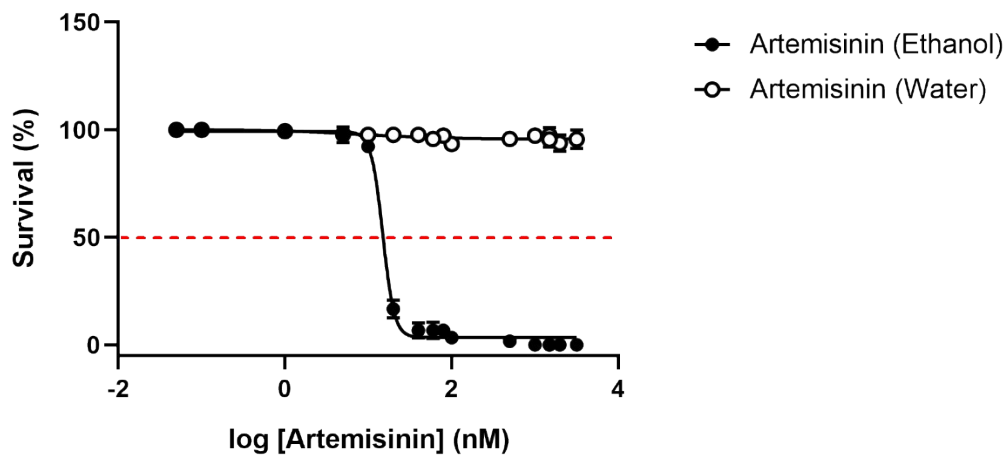

**Supplementary Figure 3: Artemisinin does not retain its antimalarial activity in water.** Artemisinin is readily soluble in Ethanol and sparingly soluble in water. We made a dispersion of the drug in water and tested a range of concentrations to check if the compound retains any antiplasmodial effect at higher doses. Artemisinin is soluble in solvents of medium polarity like, Chloroform, Toluene, Ethyl Acetate and Acetone. The compound is sparingly soluble in strong polar solvents like water, methanol and acetonitrile.

**Supplementary Table 1:** The observed effects of independent variable on the dependent variables expressed as mean $\pm$ SD(n=3)

| Std | Run | Coded Level variables |                |                | Actual Value variables |                |                | Hydrodynamic radii (r. nm) | Responses Values   |                         |
|-----|-----|-----------------------|----------------|----------------|------------------------|----------------|----------------|----------------------------|--------------------|-------------------------|
|     |     | X <sub>1</sub>        | X <sub>2</sub> | X <sub>3</sub> | X <sub>1</sub>         | X <sub>2</sub> | X <sub>3</sub> |                            | Zeta Potential(mV) | % Entrapment Efficiency |
| 10  | 1   | 0                     | 1              | -1             | 2                      | 0.3            | 1              | 126.5 $\pm$ 4.04           | -20.03 $\pm$ 0.03  | 65.94 $\pm$ 6.3         |
| 8   | 2   | 1                     | 0              | 1              | 3                      | 0.2            | 3              | 113.19 $\pm$ 3.8           | -15.20 $\pm$ 0.58  | 46.56 $\pm$ 2.96        |
| 5   | 3   | -1                    | 0              | -1             | 1                      | 0.2            | 1              | 107 $\pm$ 2.5              | -14.30 $\pm$ 0.31  | 70.641 $\pm$ 5.79       |
| 12  | 4   | 0                     | 1              | 1              | 2                      | 0.3            | 3              | 124.63 $\pm$ 6.81          | -23.70 $\pm$ 0.63  | 63.91 $\pm$ 5.62        |
| 3   | 5   | -1                    | 1              | 0              | 1                      | 0.3            | 2              | 124.45 $\pm$ 3.72          | -17.50 $\pm$ 0.77  | 72.88 $\pm$ 3.1         |
| 13  | 6   | 0                     | 0              | 0              | 2                      | 0.2            | 2              | 121.48 $\pm$ 3.66          | -18.3 $\pm$ 0.9    | 63.86 $\pm$ 0.8         |
| 11  | 7   | 0                     | -1             | 1              | 2                      | 0.1            | 3              | 97.35 $\pm$ 2.6            | -14.80 $\pm$ 0.86  | 58.8 $\pm$ 2.6          |
| 1   | 8   | -1                    | -1             | 0              | 1                      | 0.1            | 2              | 96.38 $\pm$ 3.14           | -17.40 $\pm$ 1.0   | 64.94 $\pm$ 2.7         |
| 7   | 9   | -1                    | 0              | 1              | 1                      | 0.2            | 3              | 114.50 $\pm$ 3.9           | -16.90 $\pm$ 0.12  | 69.58 $\pm$ 2.33        |
| 9   | 10  | 0                     | -1             | -1             | 2                      | 0.1            | 1              | 97.45 $\pm$ 0.49           | -19.50 $\pm$ 0.92  | 39.76 $\pm$ 1.46        |
| 2   | 11  | 1                     | -1             | 0              | 3                      | 0.1            | 2              | 94.86 $\pm$ 1.27           | -14.70 $\pm$ 0.66  | 36.39 $\pm$ 3.88        |
| 14  | 12  | 0                     | 0              | 0              | 2                      | 0.2            | 2              | 121.78 $\pm$ 2.44          | -16.60 $\pm$ 0.49  | 61.89 $\pm$ 2.3         |
| 6   | 13  | 1                     | 0              | -1             | 3                      | 0.2            | 1              | 107 $\pm$ 1.7              | -22.80 $\pm$ 0.60  | 58.49 $\pm$ 0.92        |
| 4   | 14  | 1                     | 1              | 0              | 3                      | 0.3            | 2              | 123.15 $\pm$ 3.4           | -19.50 $\pm$ 1.21  | 67.30 $\pm$ 2.6         |
| 15  | 15  | 0                     | 0              | 0              | 2                      | 0.2            | 2              | 122.56 $\pm$ 4.86          | -15.5 $\pm$ 0.78   | 62.5 $\pm$ 4.52         |

## References

1. Y. Liu, H. Lü and F. Pang, *Journal of Chemical & Engineering Data*, 2009, **54**, 762-764.
